# Supplementary material
Source: PubMed Central journal article supplement (PMC3318455)
Supplement: supp_194.8.1875_SuppTables_Figures.pdf [file supp_194.8.1875_SuppTables_Figures.pdf]

## Supporting Information

**Title:** Role of a SpoVA Protein in Dipicolinic Acid Uptake into Developing Spores of *Bacillus subtilis*

**Author affiliation:** Yunfeng Li<sup>1</sup>, Andrew Davis<sup>1</sup>, George Korza<sup>1</sup>, Pengfei Zhang<sup>2</sup>, Yong-qing Li<sup>2</sup>, Barbara Setlow<sup>1</sup>, Peter Setlow<sup>1</sup> and Bing Hao<sup>1</sup>

<sup>1</sup>Department of Molecular, Microbial and Structural Biology, University of Connecticut Health Center, Farmington, CT 06030-3305

<sup>2</sup>Department of Physics, East Carolina University, Greenville, NC 27858-4353

## **Supporting Information List**

1. Supplemental Table S1
2. Supplemental Fig. S1
3. Supplemental Fig. S2
4. Supplemental Fig. S3
5. Supplemental Fig. S4
6. Supplemental Fig. S5
7. Supplemental Fig. S6
8. Supplemental Fig. S7
9. Supplemental Fig. S8

Table S1. Structural homologs of the *B. subtilis* SpoVAD; nonredundant top-400 DaLi results.

| <b>PDB id</b> | <b>Z-score</b> | <b>Rmsd (Å)</b> | <b>Aligned residues #</b> | <b>Protein</b>                                        |
|---------------|----------------|-----------------|---------------------------|-------------------------------------------------------|
| 3H76          | 24.8           | 3.3             | 261                       | PQS biosynthetic enzyme PqsD                          |
| 2GYO          | 24.7           | 3.3             | 254                       | $\beta$ -ketoacyl-[acyl-carrier-protein] synthase III |
| 3OYT          | 24.2           | 3.1             | 263                       | $\beta$ -ketoacyl-[acyl-carrier-protein] synthase I   |
| 1WL4          | 24.1           | 2.8             | 258                       | acetyl-CoA thiolase                                   |
| 3E60          | 23.8           | 3.2             | 271                       | $\beta$ -ketoacyl-[acyl-carrier-protein] synthase II  |
| 3HHD          | 23.5           | 3.2             | 271                       | human fatty acid synthase                             |
| 3EUO          | 23.1           | 3.2             | 264                       | fungus type III polyketide synthase                   |
| 1U0W          | 22.7           | 3.3             | 271                       | stilbene synthase                                     |
| 3A5Q          | 22.6           | 3.2             | 266                       | benzalacetone synthase                                |
| 1EE0          | 22.6           | 3.2             | 267                       | 2-pyrone synthase                                     |

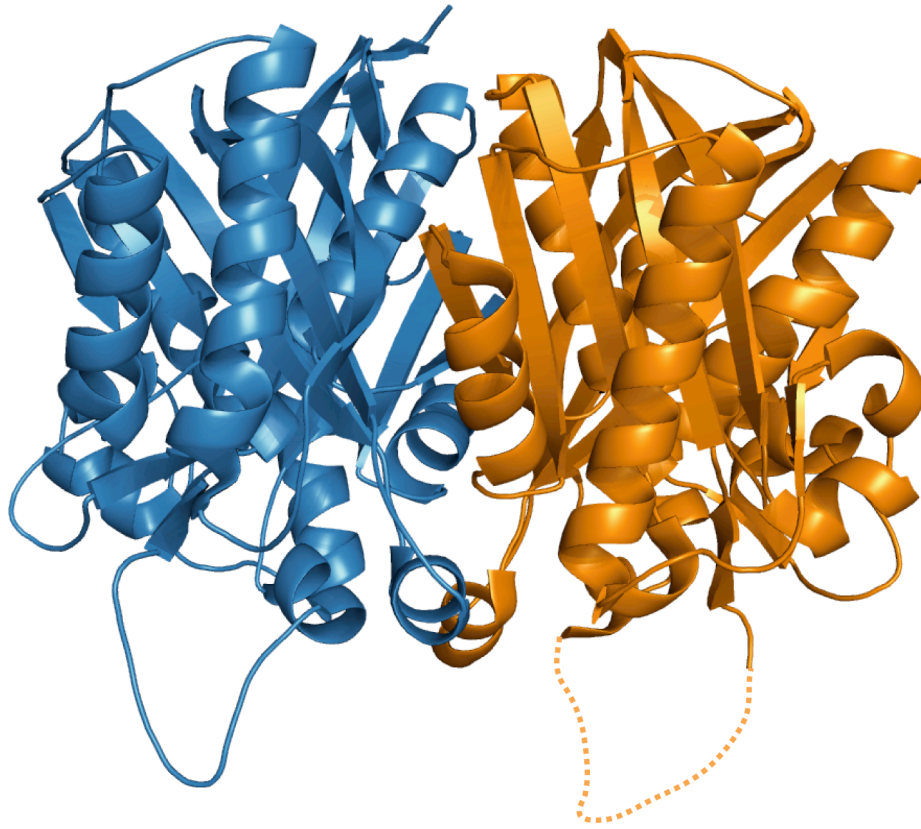

Figure S1. **Ribbon diagram of the SpoVAD crystallographic dimer (PDB code 3LM6).** The two monomers are colored blue and orange, respectively. Dotted lines represent disordered regions.

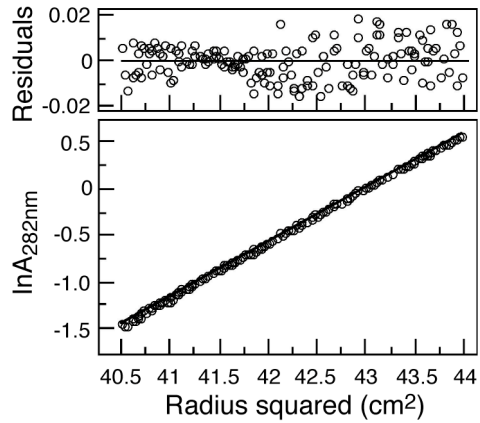

Figure S2. **SpoVAD sediments as a monomer in solution.** Equilibrium sedimentation data (16,000 rpm) of SpoVAD (60  $\mu\text{M}$ ) at 20°C in a buffer containing 15 mM Tris-HCl (pH 7.6), 100 mM NaCl and 2 mM dithiothreitol. The data fit closely to a monomer. (Upper) The deviation in the data from the linear fit for a monomeric model is plotted.

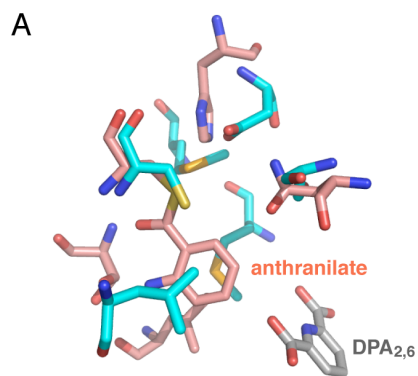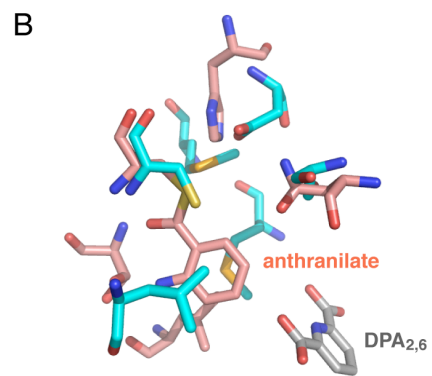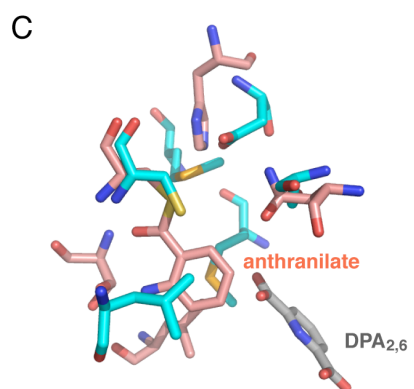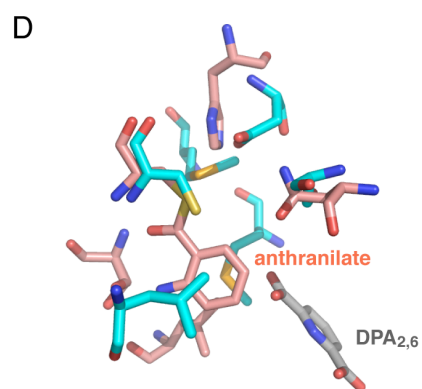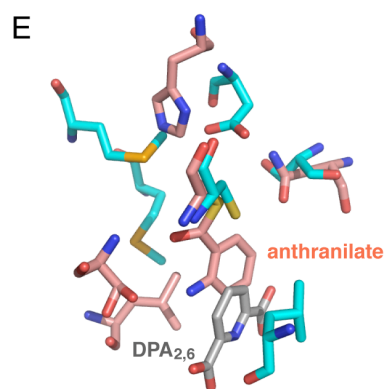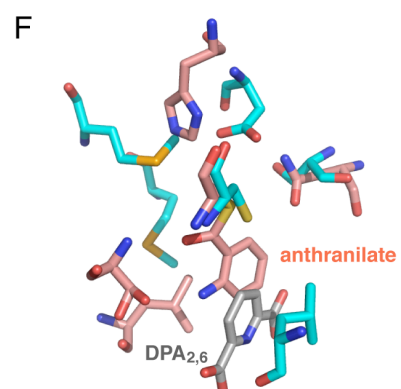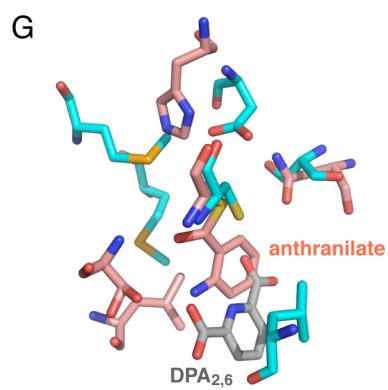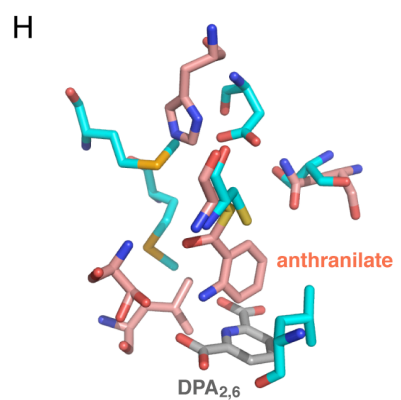

Figure S3. **The docking conformations of the DPA<sub>2,6</sub> molecule to SpoVAD.** A-H, Eight of the top nine docking solutions for the DPA<sub>2,6</sub> binding to SpoVAD (PDB code 3LM6) using AutoDock Vina. DPA<sub>2,6</sub> was docked as a rigid body and all the nine solutions found the DPA<sub>2,6</sub> molecule in the same presumed binding site in SpoVAD.

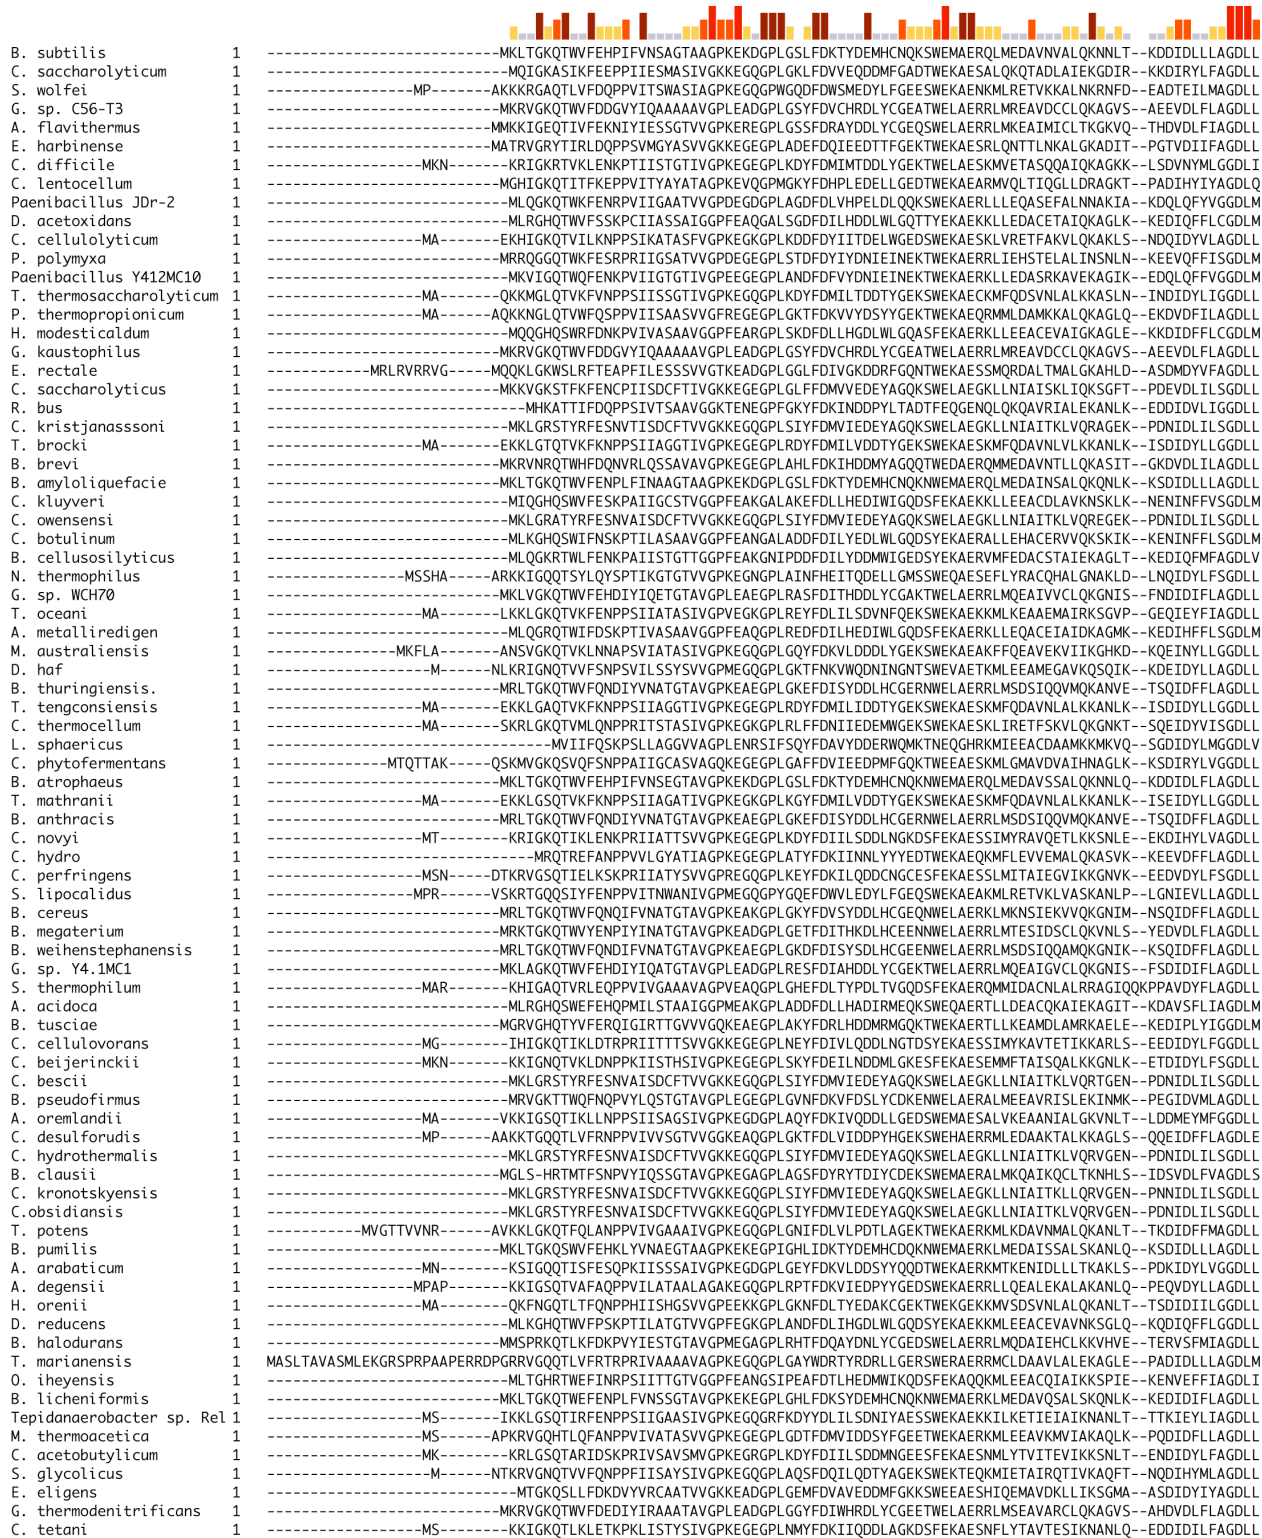

Conservation: 100-80-60-40-20%

Figure S4 (1 of 4) (Hao)





|                           |     |                                                                                              |
|---------------------------|-----|----------------------------------------------------------------------------------------------|
| B. subtilis               | 87  | NQNVNTANYVARHLKIPFLCMFGACSTSMETVAVASALVDGGFAKRALAATSSHNATAERQFRYPTEYGGQKPDATSTVTTGSGAVVISQTP |
| C. saccharolyticum        | 86  | GQLIATISFGVDLEIPLFGLFGACSTMGEALNLGAMTVAGGYADKVMMAASSHFATAEKQFRFPLESYGNQRPYASWTVTGAGAVLAKHR   |
| S. wolfei                 | 90  | NQLVSSNYAARELGIPFLGLYGACSTMESLALLAALVDGFEFFERVAIAAASHHYTAERQFRFPTEYGGQKTPSSQWTAAGAVLLEVP     |
| G. sp. C56-T3             | 87  | NQNTANSYVARELPIPLCLFGACSTMQLAAAAFVAGGLADRALAATSSHNATAERQFRYPTEYGGQKPKTATFTVTGAGAVLGRAP       |
| A. flavithermus           | 88  | NQTVTANYVASELHPIPLGVFACSTMTEAMLVASTFDGAFHRVLAATSSHYGAERQFRFPTEYGGQKESASWTVTGAGAAALSTTR       |
| E. harbinense             | 88  | NQICGTSYGLREFGIPFAGLYGACSTMESLAMAALVFEVGGFANVAALTSCHFSAERQYRPLLEYGQRAPSAQWTVTGAGAVLAPN       |
| C. difficile              | 89  | NQIVPASFARELAIPFLGIYGACSTMAGLCTGSMIDGGFADLVLSGTSYHCTAERQFRFPLELGNQKPMTAQWTVTGAGAVLAPN        |
| C. lentocellum            | 87  | NQVIASFTGKDFNIPFFGLYGACSTMESITLASMCIAGGMADLVIAGTSSHNCAAEKQFRFPLEYGGQRTETQWTVTASGFVLLSRGC     |
| Paenibacillus JDr-2       | 86  | NQIISNSFAARTLGVNPLGVFACSTMESLALASLMDVSGAGQYVLAGTCSHNTAEKQFRYPTEYGGQKPPAQWTVTGAGAVVAA         |
| D. acetoxidans            | 86  | NQIVSSSFAARTLGVNPLGVFACSTMESLALALLDKAAKYVLCATASHNASVEKQFRYPTEYGGQKPPAQWTVTGAGAAI LAP         |
| C. cellulolyticum         | 89  | NQICIAANGLRETEVPFLGLYGACSTMESLMSISLMEVGGFAENLVCMTSSHFCSAEKQFRFPLELGSORTPTSQWTVTGAGAVLSSK     |
| P. polymyxa               | 87  | NQIVSSSFAAKLIPYLVGFACSTMESLALALVDSAGDYVMAGTSHNCTVEKQFRYPTEYGGQKPPAQWTVTGAGAAIVGH             |
| Paenibacillus Y412MC10    | 86  | NQIISSSFAARQMGVPIYGVFACSTMESLAVASMLVDSGAGQYVMAGTASHNCTVEKQFRYPTEYGGQKPPYQYITGAGCSVSH         |
| T. thermosaccharolyticum  | 89  | NQIITSSFAARQFNVPFLGLYGACSTMAGLCTGSMIDGGFADYVIVTSSHFSTAERQYRFPLEGGQRPPTAQWTVTGAGAVLSS         |
| P. thermopropionicum      | 90  | NQIISANFTASSMSVPLGLYGACSTMIEGMALGAMLDGGFADRVLAATSSHYSTAERQYRFPTEYGGQKPPAQWTVTGAGAVLARE       |
| H. modesticaldum          | 86  | NQITASSFAARTMAVPYLVGFACSTMESLALASLMDVSGAGQYVLAGTCSHNTAEKQFRYPTEYGGQKPPAQWTVTGAGAVVAP         |
| G. kaustophilus           | 87  | NQNTANSYVARELPIPLCLFGACSTMQLAAAAFVAGGLADRALAATSSHNATAERQFRYPTEYGGQKPKTATFTVTGAGAVLGRAP       |
| E. rectale                | 97  | GSMAITTFGVENFRIPWFGVYACSTMESLALAAAFVAGGYARHVAVAVTSSHFSAEKQFRFPNQYANQRPVSAWTVTGAGAVVSGAGNET   |
| C. saccharolyticus        | 87  | NQITSSFAARDLNIPFLGIYGACSTMESLALASLMDVSGAGQYVLAGTCSHNTAEKQFRYPTEYGGQKPPAQWTVTGAGAVLARE        |
| R. bus                    | 84  | DQCVGTYTVGRDYLPFLGIYAACTSMESLALASLMDVSGAGQYVLAGTCSHNTAEKQFRYPTEYGGQKPPAQWTVTGAGAVLARE        |
| C. kristjanassoni         | 86  | NQIISSSFAARDLDIPFGLYGACSTMESLALASLMDVSGAGQYVLAGTCSHNTAEKQFRYPTEYGGQKPPAQWTVTGAGAVLARE        |
| T. brocki                 | 89  | NQIISANFAARQLNVPFHLGLYGACSTMTEGLTLGAMLDGGYADYIAATSSHFSTAERQYRFPTEYGGQKPPAQWTVTGAGAVLARE      |
| B. brevis                 | 87  | NQNTANSYVARELPIPLCLFGACSTMESLALAAAFVAGGLADRALAATSSHNATAERQFRYPTEYGGQKPKTATFTVTGAGAVLGRAP     |
| B. amyloliquefacie        | 87  | NQNVNTANYVARHLKIPFLCMFGACSTSMETVAVASALVDGGFAKRALAATSSHNATAERQFRNPTEYGGQKPDATSTVTTGAGAVISQNP  |
| C. kluyveri               | 86  | NQIITSSFAARTLKIPLYGVFACSSMEGLALASLMDVSGAGQYVLAGTCSHNTAEKQFRYPTEYGGQKPPAQWTVTGAGAVLARE        |
| C. owensensi              | 86  | NQIISSSFAARDLDIPFGLYGACSTMESLALASLMDVSGAGQYVLAGTCSHNTAEKQFRYPTEYGGQKPPAQWTVTGAGAVLARE        |
| C. botulinum              | 86  | NQIVSSSFAARTLGIYVYFGLYGACSSMEGLALAAQIEKAAKYVITAAASHNAAAEKQFRYPTEYGGQKPPAQWTVTGAGAVLGR        |
| B. cellulosilyticus       | 86  | NQLTPTSSFAARTLAAPYLVGFACSTMESLALASLMDVSGAGQYVLAGTCSHNTAEKQFRYPTEYGGQKPPAQWTVTGAGAVVAP        |
| N. thermophilus           | 93  | NQIVSSSNLVAKLLQIPYLVGFACSTMESLALASLMDVSGAGQYVLAGTCSHNTAEKQFRYPTEYGGQKPPAQWTVTGAGAVVAP        |
| G. sp. WCH70              | 87  | NQNVNTANYVAQTIPFLCMFGACSTSMETVAVASALVDGGFAKRALAATSSHNATAERQFRYPTEYGGQKPKTATFTVTGAGAVLGRAP    |
| T. oceanii                | 89  | NQIITASSFAARELGPFFGIYGACSTMAGLCTGSMIDGGFADYVIVTSSHFSTAERQYRFPLEGGQRPPTAQWTVTGAGAVLARE        |
| A. metalliregigen         | 86  | NQIITSSSFAARTLGMPLYGVFACSSMEGLALAAALVDSGAGKNAALAAASHNAAVEKQFRYPTEYGGQKPPAQWTVTGAGAVVAP       |
| M. australiensis          | 92  | NQIISDFAAARQLGIPFGLYGACSTMESAMALGAMLDGGFADYVIVTSSHFSTAERQYRFPLELGVQRPTAHWTVTGAGAAVNSQ        |
| D. haf                    | 89  | NQIISANFAARTMGIPFLGLYGACSTMALMSVGTMLIDGGFARKVLAATSSHHTAERQYRFPTEYGGQKPPAQWTVTGAGAVLGR        |
| B. thuringiensis          | 87  | NQNVNTANYVARKNIPFLGMFACSTSMETLAVGSAFIDGGFANRVLATVSSHNTAERQFRYPTEYGGQKPGTANSTVTTGAGAVLSQTP    |
| T. tengconsiensis         | 89  | NQIISANFAARQLNVPFHLGLYGACSTMTEGLTLGAMLDGGYADYIAATSSHFSTAERQYRFPTEYGGQKPPAQWTVTGAGAVLARE      |
| C. thermocellum           | 89  | NQICIAANGLRESDVPFFGVYACSTIAESMISIGAMLDVGGFADNVCTSSHFCSAEKQFRFPLELGTQRPPSAQWTVTGAGAVLARE      |
| L. sphaericus             | 81  | NQMTPTNFARLDLIPFGLYGACSTMESLALASLMDVSGAGQYVLAGTCSHNTAEKQFRYPTEYGGQKPPAQWTVTGAGAVLARE         |
| C. phytofermentans        | 95  | GQLIATISFGIENFLEIPLGVYACSTMESLALAAALVDGFEFFERVAIAAASHHYTAERQFRFPTEYGGQKTPSSQWTAAGAVLLEVP     |
| B. atrophaeus             | 87  | NQNVNTANYVARHLKIPFLCMFGACSTSMETVAVASALVDGGFAKRALAATSSHNATAERQFRNPTEYGGQKPDATSTVTTGAGAVISQNP  |
| T. mathranii              | 89  | NQIISANFAARQLNVPFHLGLYGACSTMTEGLTLGAMLDGGYADYIAATSSHFSTAERQYRFPTEYGGQKPPAQWTVTGAGAVLARE      |
| B. anthracis              | 87  | NQTVTANYVARKNIPFLGMFACSTSMETLAVGSAFIDGGFANRVLATVSSHNTAERQFRYPTEYGGQKPGTANSTVTTGAGAVLSQTP     |
| C. novyi                  | 88  | NQITASSFAARDVDIPFLGLYGACSTMESLAVASMLVDSGAGQYVLAGTCSHNTAEKQFRYPTEYGGQKPPAQWTVTGAGAVLARE       |
| C. hydro                  | 83  | NQIISANFAARQLGIPFGLYNACTFYEGLLGAMLDGGFADYVIVTSSHFSTAERQYRFPLEGGQRPPTAQWTVTGAGAVLARE          |
| C. perfringens            | 91  | NQIISNSFAARELKIPLYGVFACSSMEGLALAAQIEKAAKYVITAAASHNAAAEKQFRYPTEYGGQKPPAQWTVTGAGAVLGR          |
| S. lipocalidus            | 91  | NQIISANFAARELKIPLYGVFACSSMEGLALAAQIEKAAKYVITAAASHNAAAEKQFRYPTEYGGQKPPAQWTVTGAGAVLGR          |
| B. cereus                 | 87  | NQNVNTANYVARDMIPFLGMFACSTSMETLAVGSAFIDGGFANRVLATVSSHNTAERQFRYPTEYGGQKPPAQWTVTGAGAVLARE       |
| B. megaterium             | 87  | NQNVNTANFVARHNIQIPFLCMFGACSTSMETLAVGSAFIDGGFANRVLATVSSHNTAERQFRNPTEYGGQKPDATSTVTTGAGAVISQNP  |
| B. weihenstephanensis     | 87  | NQNVNTANYVAREYIPFLGMFACSTSMETLAVGSAFIDGGFANRVLATVSSHNTAERQFRNPTEYGGQKPDATSTVTTGAGAVISQNP     |
| G. sp. Y4.1MC1            | 87  | NQNVNTANYVARTVAPFLCMFGACSTSMETLAVGSAFIDGGFANRVLATVSSHNTAERQFRNPTEYGGQKPDATSTVTTGAGAVISQNP    |
| S. thermophilum           | 91  | NQLITATFASGLGLVPLGLYGACSTMTEGLTLGAMLDGGYADYIAATSSHFSTAERQYRFPTEYGGQKPPAQWTVTGAGAVLARE        |
| A. acidoca                | 86  | NQIISNSFAARELKIPLYGVFACSSMEGLALAAQIEKAAKYVITAAASHNAAAEKQFRYPTEYGGQKPPAQWTVTGAGAVLGR          |
| B. tusciae                | 87  | DQITTTNFAASFLGSMYLVGFACSTMESLALAAALVDGFEFFERVAIAAASHHYTAERQFRFPTEYGGQKTPSSQWTAAGAVLLEVP      |
| C. cellulovorans          | 88  | NQLTATSFARVRLNIPFGLYGACSTMESLALASLMDVSGAGQYVLAGTCSHNTAEKQFRYPTEYGGQKPPAQWTVTGAGAVLARE        |
| C. beijerinckii           | 89  | NQIISNSFAARELKIPLYGVFACSSMEGLALAAQIEKAAKYVITAAASHNAAAEKQFRYPTEYGGQKPPAQWTVTGAGAVLGR          |
| C. besicii                | 86  | NQIISNSFAARELKIPLYGVFACSSMEGLALAAQIEKAAKYVITAAASHNAAAEKQFRYPTEYGGQKPPAQWTVTGAGAVLGR          |
| B. pseudofirmus           | 86  | NQIVTSSNYAARQLSIPFLGMFACSTMESLALASLMDVSGAGQYVLAGTCSHNTAEKQFRYPTEYGGQKPPAQWTVTGAGAVLARE       |
| A. oremlandii             | 89  | NQIMSTSSFAARDMKVPFLGLYGACSTMESLALASLMDVSGAGQYVLAGTCSHNTAEKQFRYPTEYGGQKPPAQWTVTGAGAVLARE      |
| C. desulfuridis           | 90  | NQIILASSFAACSLGPHLGLYGACSTMESLALAAALVDGFEFFERVAIAAASHHYTAERQFRFPTEYGGQKTPSSQWTAAGAVLLEVP     |
| C. hydrothermalis         | 86  | NQLSSSFAARDLDIPFGLYGACSTMESLALASLMDVSGAGQYVLAGTCSHNTAEKQFRYPTEYGGQKPPAQWTVTGAGAVLARE         |
| B. clausii                | 86  | NQITASSFVARDLQPLGYGACSTMESLALASLMDVSGAGQYVLAGTCSHNTAEKQFRYPTEYGGQKPPAQWTVTGAGAVLARE          |
| C. kronotskyensis         | 86  | NQIISNSFAARELKIPLYGVFACSSMEGLALAAQIEKAAKYVITAAASHNAAAEKQFRYPTEYGGQKPPAQWTVTGAGAVLGR          |
| C. obsidiansis            | 86  | NQIISNSFAARELKIPLYGVFACSSMEGLALAAQIEKAAKYVITAAASHNAAAEKQFRYPTEYGGQKPPAQWTVTGAGAVLGR          |
| T. potens                 | 97  | NQIISANFTARDLGIPLYGVFACSTMESLALASLMDVSGAGQYVLAGTCSHNTAEKQFRYPTEYGGQKPPAQWTVTGAGAVLARE        |
| B. pumilis                | 87  | NQNVNTANYVARELKIPLYGVFACSTMESLALASLMDVSGAGQYVLAGTCSHNTAEKQFRNPTEYGGQKPDATSTVTTGAGAVISQNP     |
| A. arabaticum             | 88  | NQVVTNSFAVKFIPYVGIYACSTLAELGLGAVLDGGFANRVLATVSSHNTAERQYRFPTEYGGQKPPAQWTVTGAGAVLARE           |
| A. degensii               | 90  | NQIVANFAARALGIPYVGLYGACSTIYEGLLGAMLDGGFADYVIVTSSHFSTAERQYRFPTEYGGQKPPAQWTVTGAGAVLARE         |
| H. oreii                  | 88  | NQLITANFVARDYVPLGLYGACSTMESLALAAALVDGFEFFERVAIAAASHHYTAERQFRFPTEYGGQKTPSSQWTAAGAVLLEVP       |
| D. reducus                | 86  | NQIISNSFAARELKIPLYGVFACSSMEGLALAAQIEKAAKYVITAAASHNAAAEKQFRYPTEYGGQKPPAQWTVTGAGAVLGR          |
| B. halodurans             | 87  | NQNVNTANYVARLGIPLYGVFACSTMESLALAAALVDGFEFFERVAIAAASHHYTAERQFRFPTEYGGQKTPSSQWTAAGAVLLEVP      |
| T. marianensis            | 114 | NQLITCANFTAELDIPFLGLFAACATWAAALGLAAMAADGAYATVLCITSSHHTAERQYRFPTEYGGQKPPAQWTVTGAGAVLARE       |
| O. iheyensis              | 86  | NQITPTSSFAARTVGPYLVGFACSTMESLALAAALVDGFEFFERVAIAAASHHYTAERQFRFPTEYGGQKTPSSQWTAAGAVLLEVP      |
| B. licheniformis          | 87  | NQNVNTANYVARHLKIPFLCMFGACSTSMETVAVASALVDGGFAKRALAATSSHNATAERQFRNPTEYGGQKPDATSTVTTGAGAVISQNP  |
| Tepidanaerobacter sp. Rel | 89  | NQIISAGFAARELKIPLYGVFACSSMEGLALAAQIEKAAKYVITAAASHNAAAEKQFRYPTEYGGQKPPAQWTVTGAGAVLGR          |
| M. thermoacetica          | 90  | NQIISANYAARSLGIPLYGVFACSTMIEGMALGAMLDGGFADRVLAATSSHYSTAERQYRFPTEYGGQKPPAQWTVTGAGAVLARE       |
| C. acetobutylicum         | 88  | NQIITSSSFAARDKIPYLVGFACSTMESLALAAALVDGFEFFERVAIAAASHHYTAERQFRFPTEYGGQKTPSSQWTAAGAVLLEVP      |
| S. glycolicus             | 89  | NQIISANFTARQLLPIPLYGVFACSTMALTTALGMLIDGGFANRVLATVSSHHTAERQYRFPTEYGGQKPPAQWTVTGAGAVLARE       |
| E. eligens                | 85  | NQLIATSFGLMRYEIPMFLYGACSTMESLALAAALVDGFEFFERVAIAAASHHYTAERQFRFPTEYGGQKTPSSQWTAAGAVLLEVP      |
| G. thermodenitrificans    | 87  | NQNTANSYVARELPIPLCLFGACSTMQLAAAAFVAGGLADRALAATSSHNATAERQFRYPTEYGGQKPKTATFTVTGAGAVLGRAP       |
| C. tetani                 | 88  | NQLSSSFAARDMNIPIPLYGVFACSTMESLALAAALVDGFEFFERVAIAAASHHYTAERQFRFPTEYGGQKTPSSQWTAAGAVLLEVP     |

Conservation: 100-80-60-40-20%

Figure S4 (2 of 4) (Hao)

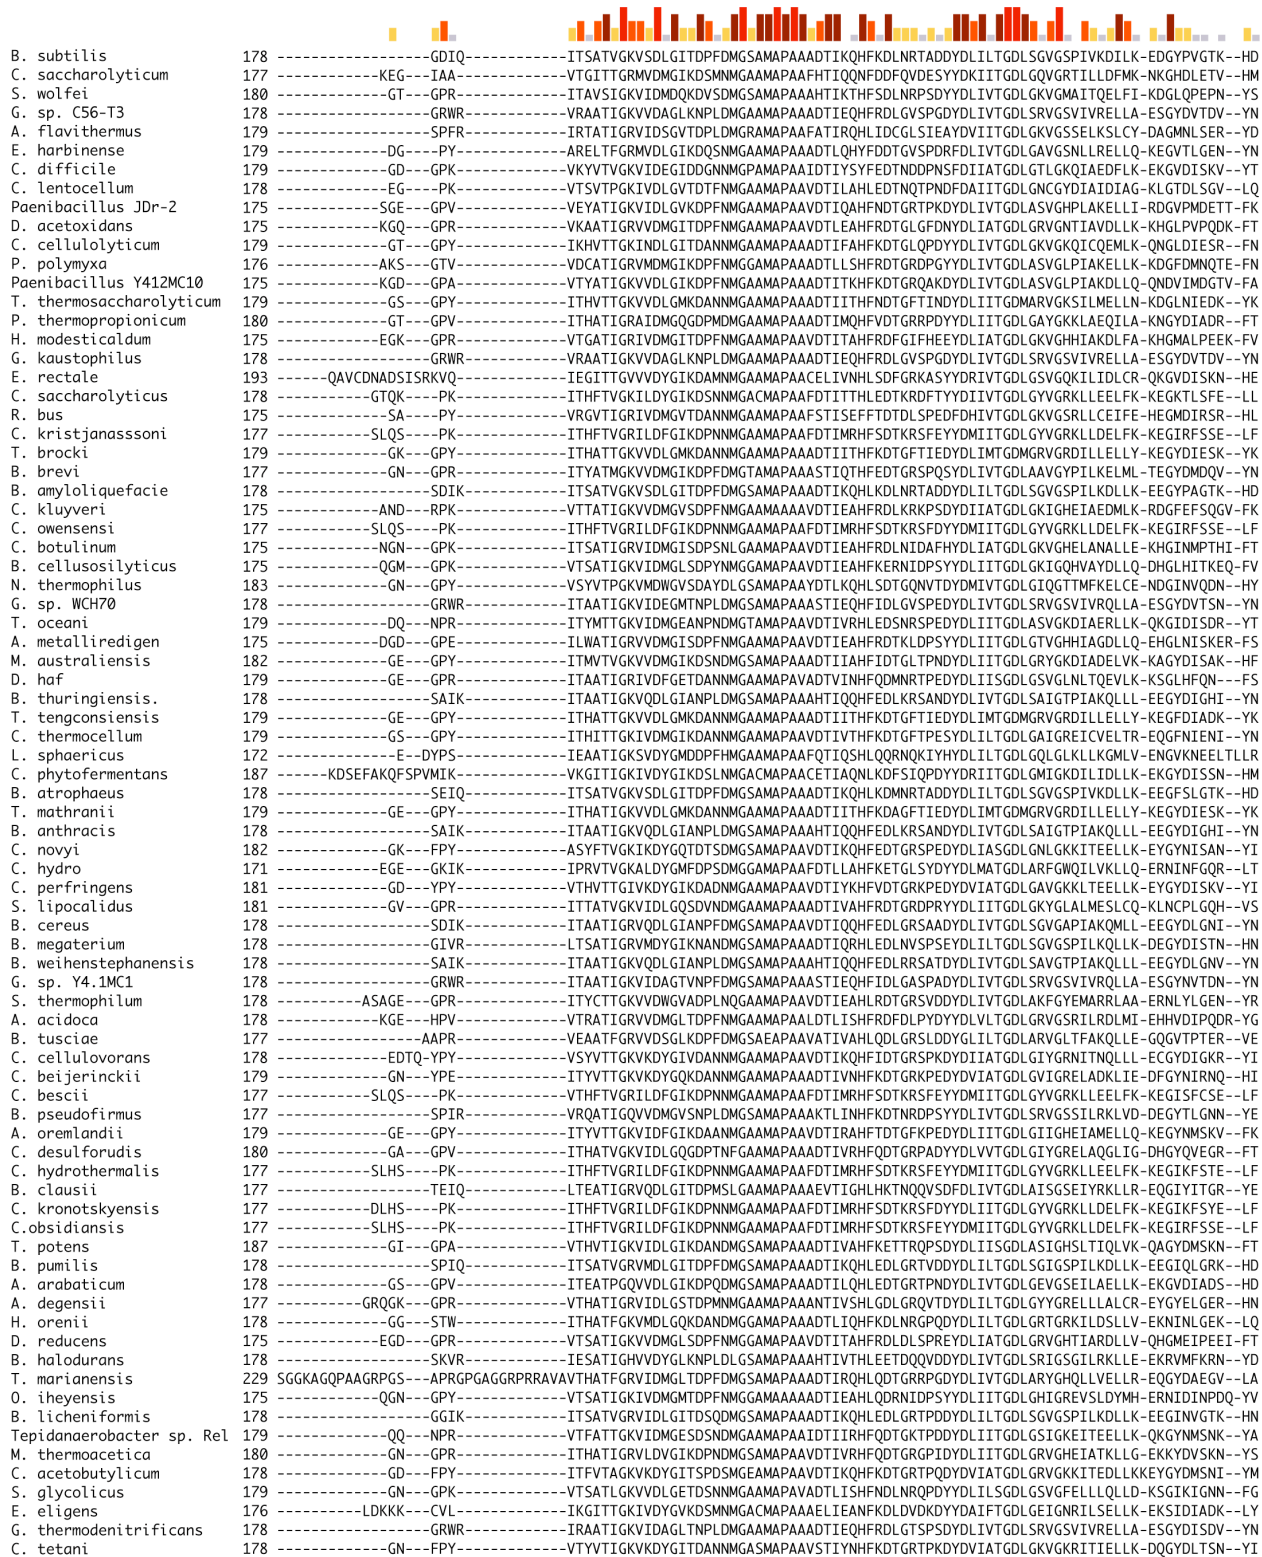



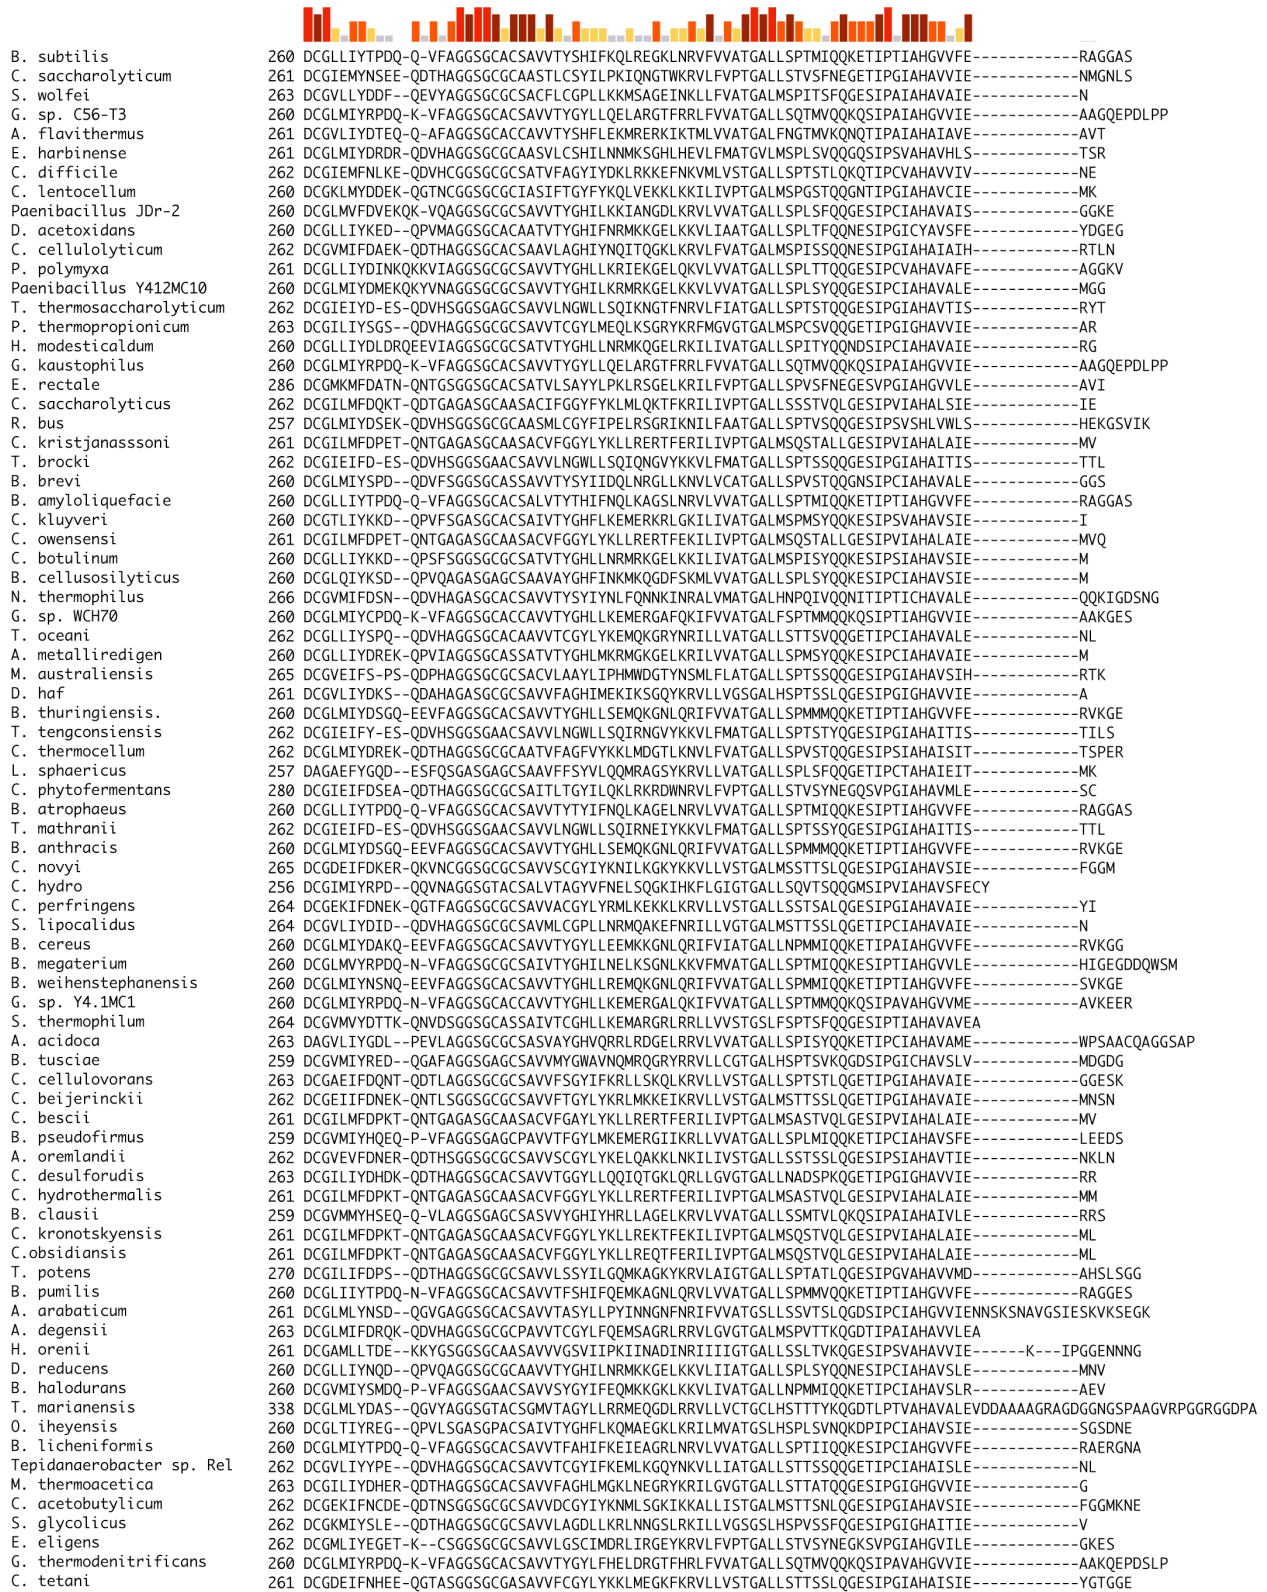

Figure S4 (4 of 4) (Hao)

Figure S4. **Sequence alignment of SpoVAD orthologs in the *Bacillus* and *Clostridium* species.** A ClustalW alignment of 80 SpoVAD orthologs was performed using DNASTAR Lasergene suite 8 (DNASTAR Inc., Madison, WI). Sequence conservation is shown as a bar graph, with red bars indicating identity among SpoVAD homologs.

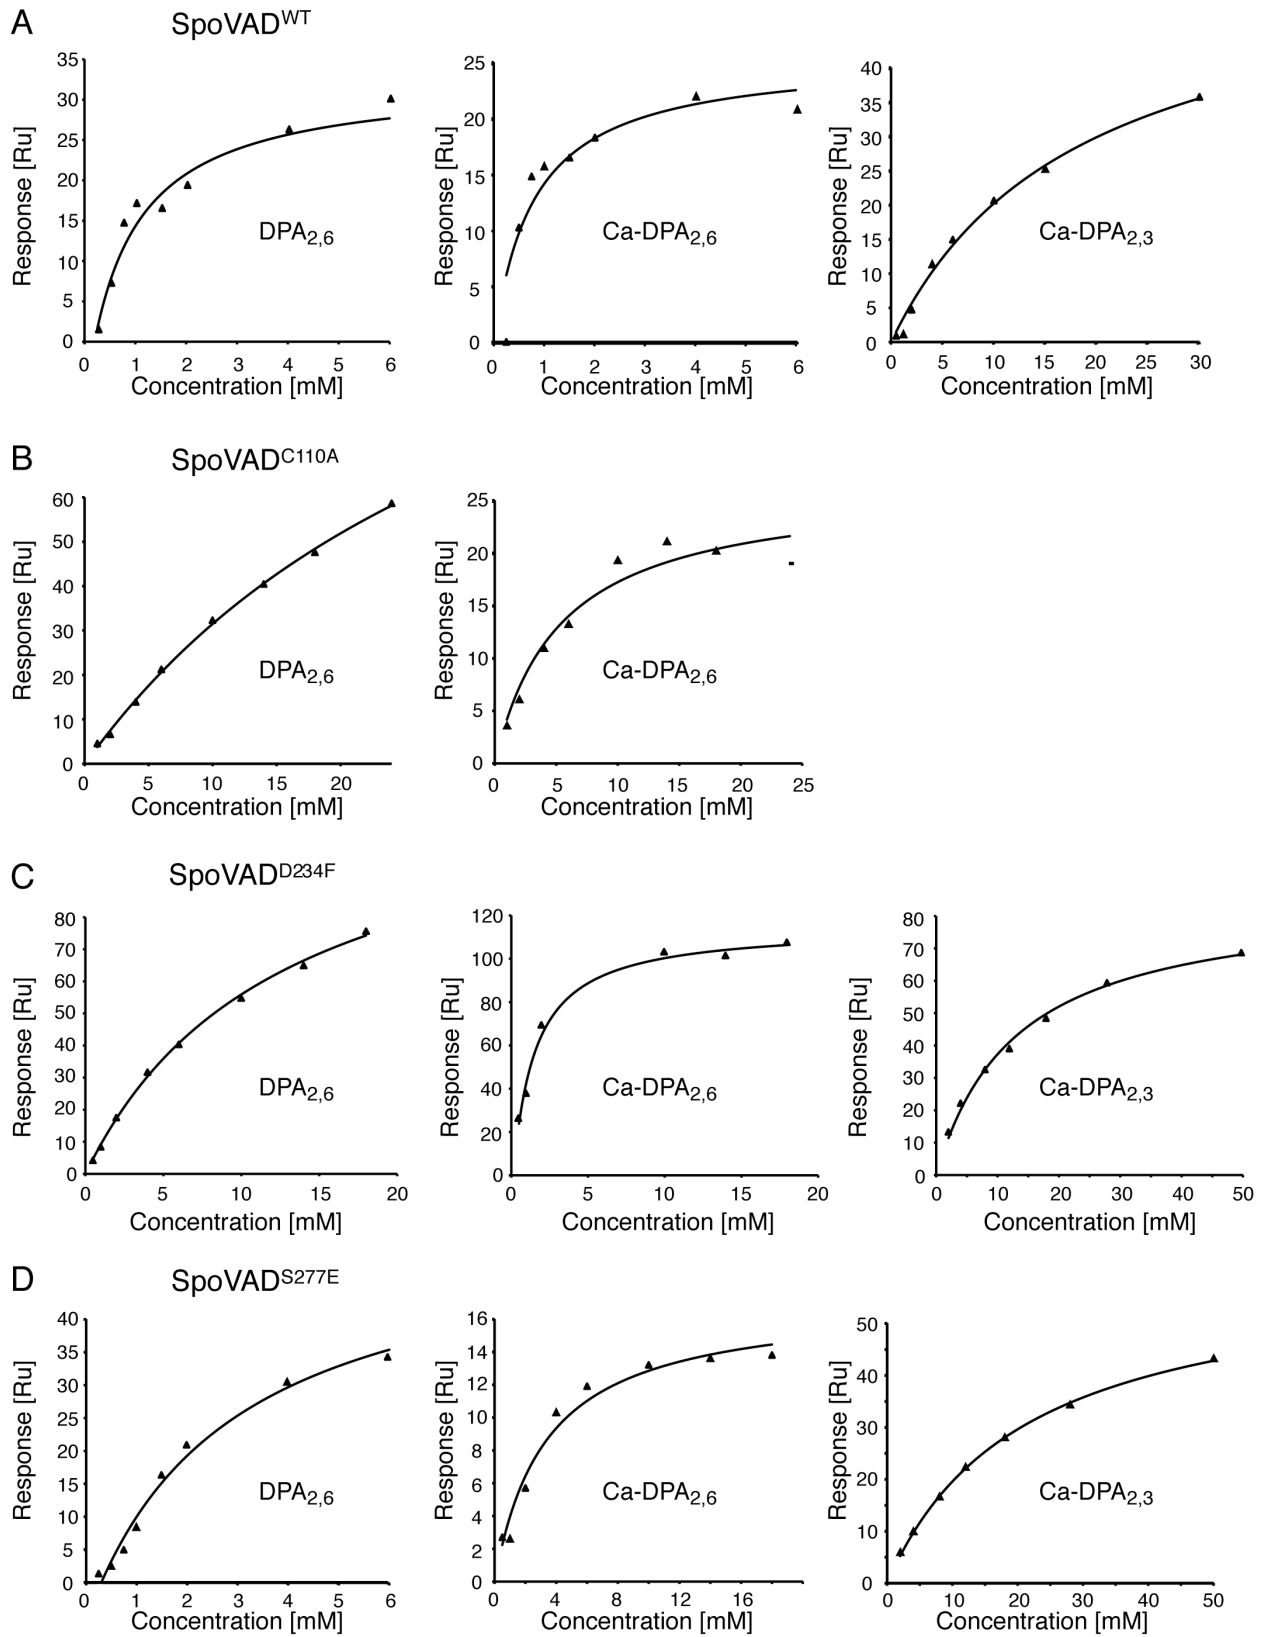

Figure S5. **Binding of DPA and Ca-DPA to mutant SpoVAD proteins.** An overlay of the representative Biacore SPR sensorgrams displaying the association curves of 2 mM DPA (DPA<sub>2,6</sub>, DPA<sub>2,3</sub>, DPA<sub>2,5</sub> and DPA<sub>3,5</sub>; left) and Ca-DPA (Ca-DPA<sub>2,6</sub>, Ca-DPA<sub>2,3</sub>, Ca-DPA<sub>2,5</sub> and Ca-DPA<sub>3,5</sub>; right) with the SpoVAD<sup>C110A</sup> (A), SpoVAD<sup>D234F</sup> (B) and SpoVAD<sup>S277E</sup> (C) mutant proteins.

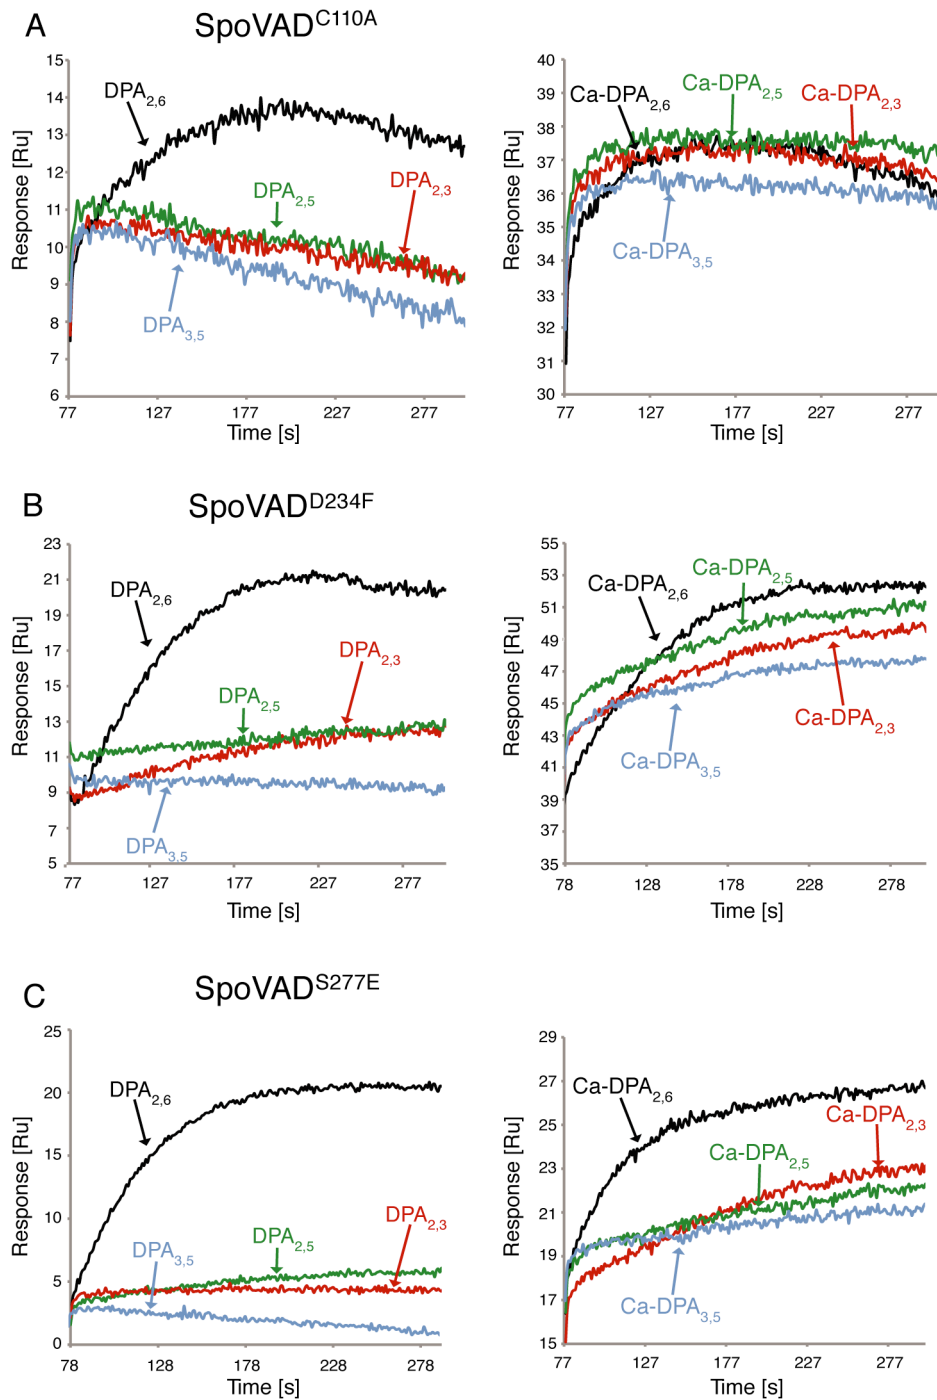

Figure S6. **Measurement of binding affinity of DPA/Ca-DPA to SpoVAD by SPR.** Multiple concentrations of DPA<sub>2,6</sub>, Ca-DPA<sub>2,6</sub> or Ca-DPA<sub>2,3</sub> were used to determine their binding affinity ( $K_D$ ) to the wild-type SpoVAD (A), SpoVAD<sup>C110A</sup> (B), SpoVAD<sup>D234F</sup> (C) and SpoVAD<sup>S277E</sup> (D) (also see Table 1). The titration data were analyzed by nonlinear curve fitting to a steady-state

model using Biacore T100 analysis software (GE Healthcare, Piscataway, NJ) and OriginPro 7.5 (OriginLab Corporation, Northampton, MA). The binding of Ca-DPA<sub>2,3</sub> to SpoVAD<sup>C110A</sup> was too weak to be measured.



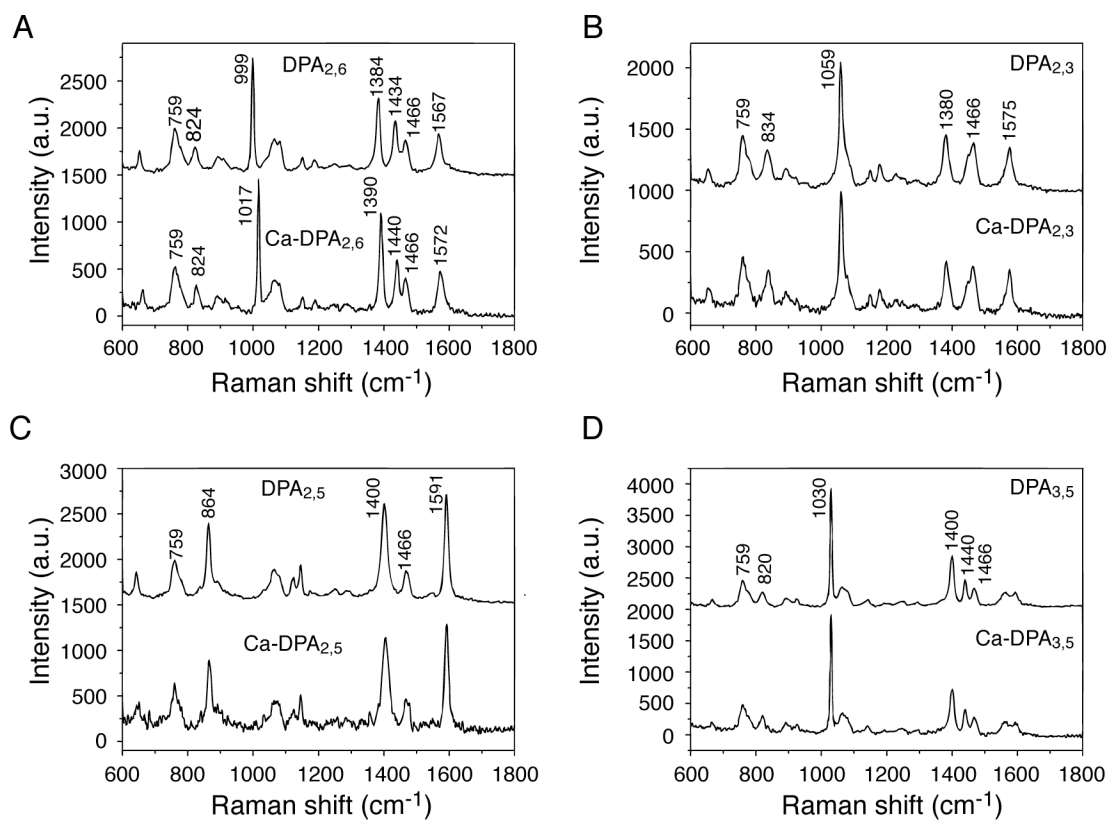

Figure S7. **Raman spectra of DPA<sub>2,6</sub>, Ca-DPA<sub>2,6</sub> and their isomers.** For each measurement, 60 mM of DPA<sub>2,6</sub> or Ca-DPA<sub>2,6</sub> (A), DPA<sub>2,3</sub> or Ca-DPA<sub>2,3</sub> (B), DPA<sub>2,5</sub> or Ca-DPA<sub>2,5</sub> (C) and DPA<sub>3,5</sub> or Ca-DPA<sub>3,5</sub> (D) were used. The laser power used was 30 mW and the integration time for Raman measurement was 20 s.

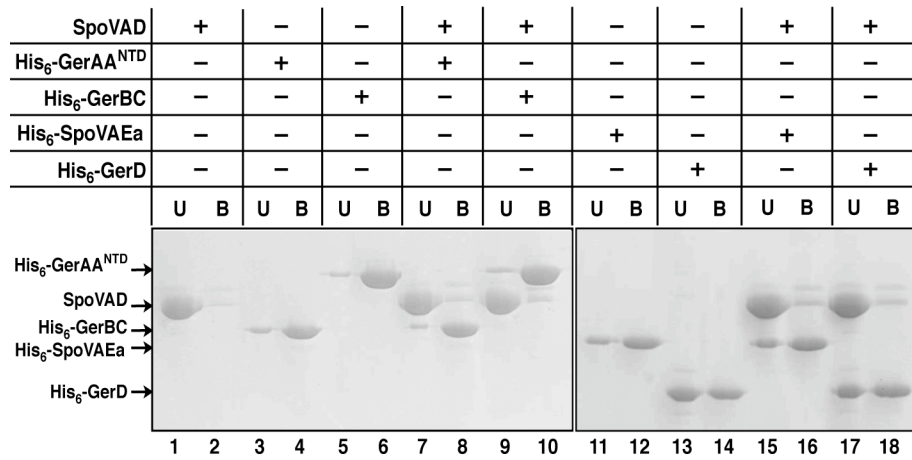

Figure S8. **SpoVAD does not interact with other germinant proteins including SpoVAEa, GerD, GerBC and GerAA<sup>NTD</sup> *in vitro*.** A Ni<sup>2+</sup>-NTA pull-down assay was used to characterize the interaction of SpoVAD with the His<sub>6</sub>-tagged SpoVAEa, GerD, GerBC and GerAA<sup>NTD</sup>. Indicated proteins were incubated and reactions were precipitated with Ni<sup>2+</sup>-NTA resin. The unbound (U) and eluted bound (B) fractions were analyzed by SDS-PAGE and Coomassie staining.
